# Supplementary material for: Chondroitin sulfate proteoglycan 4 regulates zebrafish body axis organization via Wnt/planar cell polarity pathway
Source: PubMed Central journal article supplement (PMC7117731; doi:10.1371/journal.pone.0230943), 2020-04-02
Supplement: pone.0230943.s001.pdf [file pone.0230943.s001.pdf]

## S1\_text

### The efficiency of sgRNAs is low in the first exon of *cspg4*

To generate the *cspg4* mutant zebrafish by using CRISPR/Cas9 system, sgRNAs were designed targeting the exons of *cspg4* (Table1) (S1\_Figure1A) and injected into fertilized eggs with Cas9 mRNA. One day after injection, embryos were collected and heteroduplex mobility assay (HMA) was used to validate the efficiency of sgRNAs. The results showed that the sgRNAs targeting the first exon exerted lower efficiency compared to the sgRNA targeting the 10th exon (S1\_Figure1 B, C and D). Due to the low efficiency of sgRNAs targeting the first exon, we did not generate any knockout line from the injected founder thus far.

To knockdown *cspg4* by an alternative strategy, CRISPR interference was used and several sgRNAs were injected with de-activated Csa9 (dCas9). However, similar to their knockout efficiencies, these sgRNAs were not able to knockdown the expression level of *cspg4* (S1\_Figure 1 E, F, G and H). Therefore, we combined the ineffective dose of *cspg4* morpholinos MO-e2i2 and MO-start to reduce the off-target effect of morpholinos since the morpholino with different sequence might not have the same off-target effect.

Table 1. *Cspg4* sgRNA target sequences

| Name          | Target sequence      | Strand  |
|---------------|----------------------|---------|
| Cspg4_sg_ex1A | GGTGTACTCATGGAGGGGGC | Reverse |
| Cspg4_sg_ex1B | GGGTGTACTCATGGAGGGGG | Reverse |
| Cspg4_sg_ex1C | GCAGGGTGTACTCATGGAGG | Reverse |
| Cspg4_sg_ex1D | TGGGACCTGGAGAGCGTGCA | Reverse |
| Cspg4_sg_ex1E | GGAGCAGGTATAGGAGTGCC | Reverse |
| Cspg4_sg_ex1F | GGTATAGGAGTGCCAGGAAG | Reverse |
| Cspg4_sg_ex1G | CTCCATTGGTGGTCTGGAGC | Reverse |
| Cspg4_sg_ex1H | AGCAGTCTTACCTCCATTGG | Reverse |
| Cspg4_sg_ex10 | GGAGATCTTAAACACAACCG | Forward |

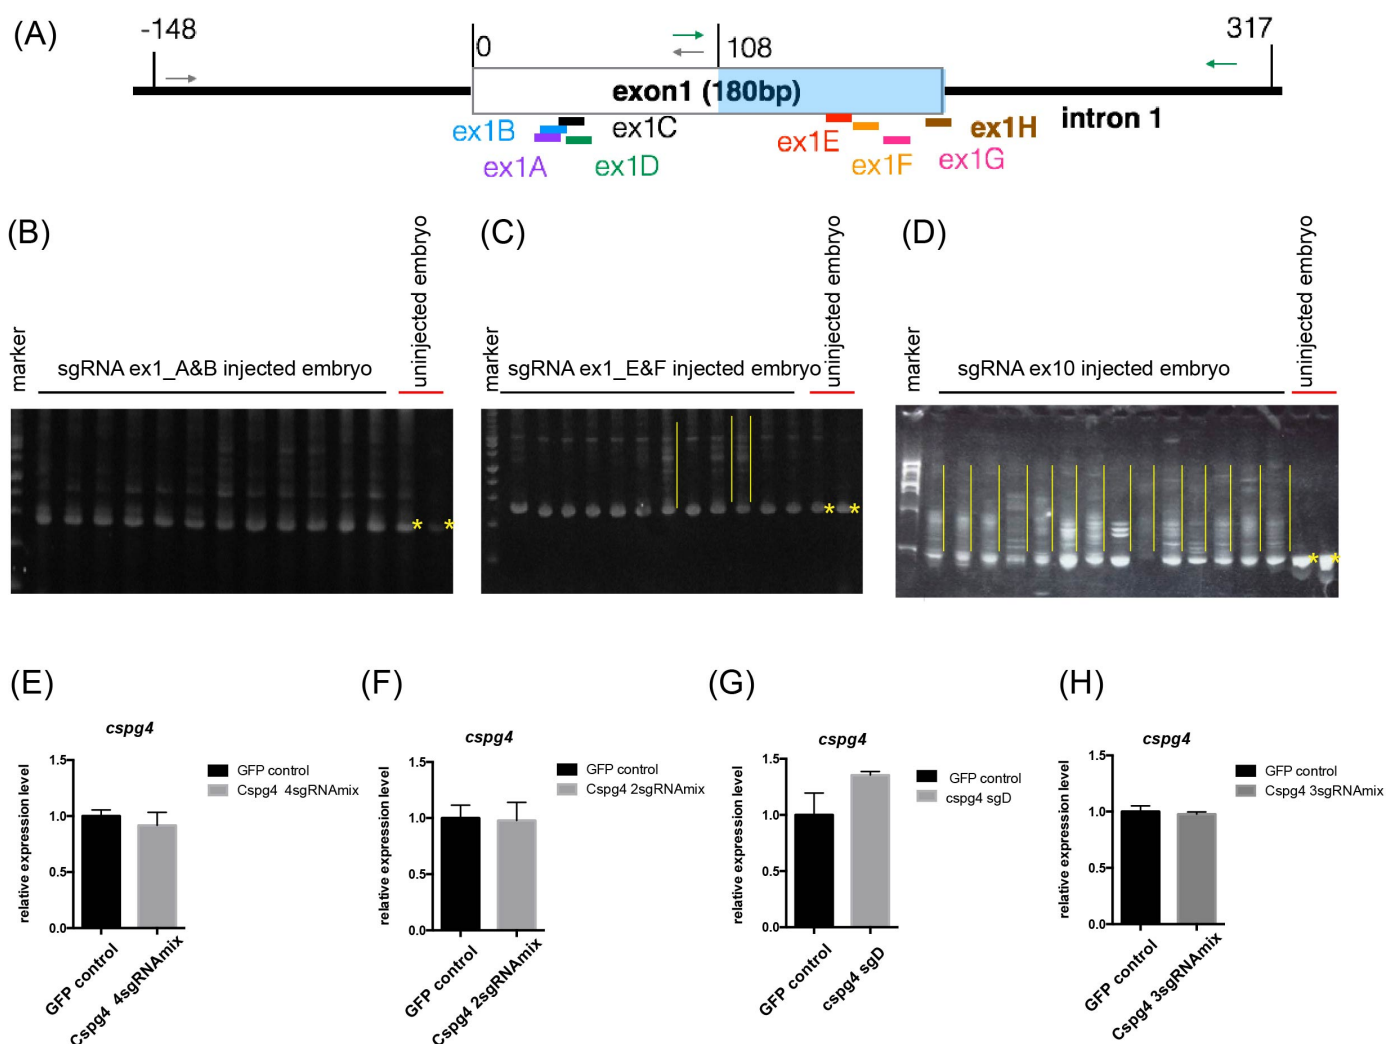

**S1\_Figure1. The efficiency of sgRNAs targeting the first exon is lower than the sgRNA targeting the tenth exon.** (A) A scheme demonstrates the sgRNA target sites in the first exon. Blue box indicates the coding sequence. (B) The genome insertions and deletions (indels) of embryos injected with the sgRNA *cspg4\_sg\_ex1A* and *cspg4\_sg\_ex1B* were detected by HMA profile. (C) Indels of embryos injected with the sgRNA *cspg4\_sg\_ex1E* and *cspg4\_sg\_ex1F* were detected by HMA profile. (D) Indels of embryos injected with the sgRNA *cspg4\_sg\_ex10* were detected by HMA profile. (E) *Cspg4* expression level of embryo injected with dCas9 and four sgRNAs (*cspg4\_sg\_ex1A*, *cspg4\_sg\_ex1B*, *cspg4\_sg\_ex1E* and *cspg4\_sg\_ex1F*) was detected by quantitative PCR. (F) *Cspg4* expression level of embryo injected with dCas9 and two sgRNAs (*cspg4\_sg\_ex1A* and *cspg4\_sg\_ex1E*) was detected by quantitative PCR. (G) *Cspg4* expression level of embryo injected with dCas9 and a sgRNA (*cspg4\_sg\_ex1D*) was detected by quantitative PCR. (H) *Cspg4* expression level of embryo injected with dCas9 and three sgRNAs (*cspg4\_sg\_ex1C*, *cspg4\_sg\_ex1G*, and *cspg4\_sg\_ex1H*) was detected by quantitative PCR. Embryos injected with sgRNA targeting GFP sequence were used as control group. Gray arrows in panel (A) indicate the primer pair used in the HMA of panel (B). Green arrows in panel (A) indicate the primer pair used in the HMA of panel (C). Yellow asterisks (\*) indicate the expected homoduplex bands. The multiple heteroduplex bands labeled by yellow line demonstrated the indels of *cspg4* sgRNAs injected embryos. The significant difference in panel (E, F, G and H) was tested by Student's *t*-test.
