# Supplementary material for: Chondroitin sulfate proteoglycan 4 regulates zebrafish body axis organization via Wnt/planar cell polarity pathway
Source: PubMed Central journal article supplement (PMC7117731; doi:10.1371/journal.pone.0230943), 2020-04-02
Supplement: pone.0230943.s003.pdf [file pone.0230943.s003.pdf]

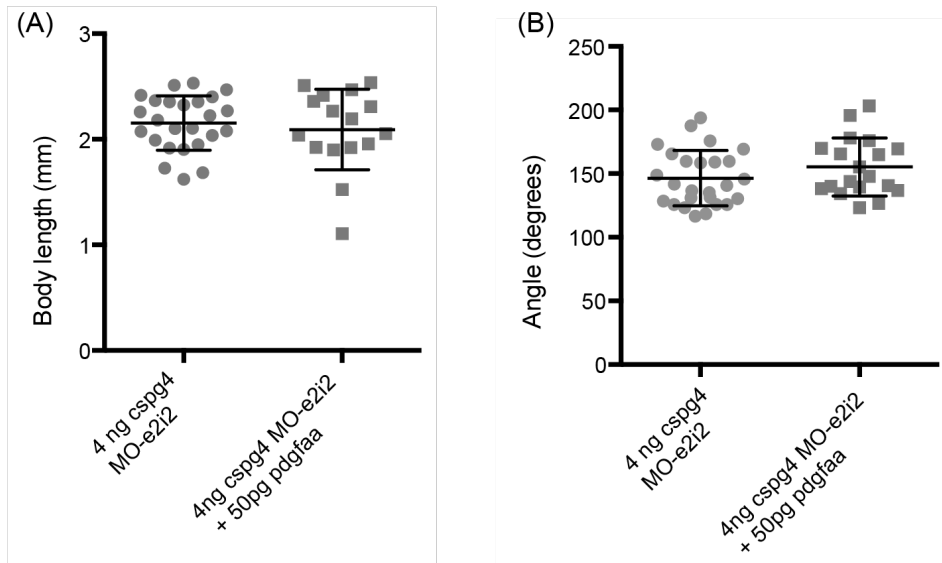

**S2\_Fig2. The phenotypes of *cspg4* morphants could not be rescued by co-injecting *pdgfaa* mRNA.** The body length at 1 dpf (A) and the angle between anterior end and tailbud at tailed stage(B) were not rescued by co-injecting *pdgfaa* mRNA.
