# Supplementary material for: Chondroitin sulfate proteoglycan 4 regulates zebrafish body axis organization via Wnt/planar cell polarity pathway
Source: PubMed Central journal article supplement (PMC7117731; doi:10.1371/journal.pone.0230943), 2020-04-02

S3\_raw image

Fig2A

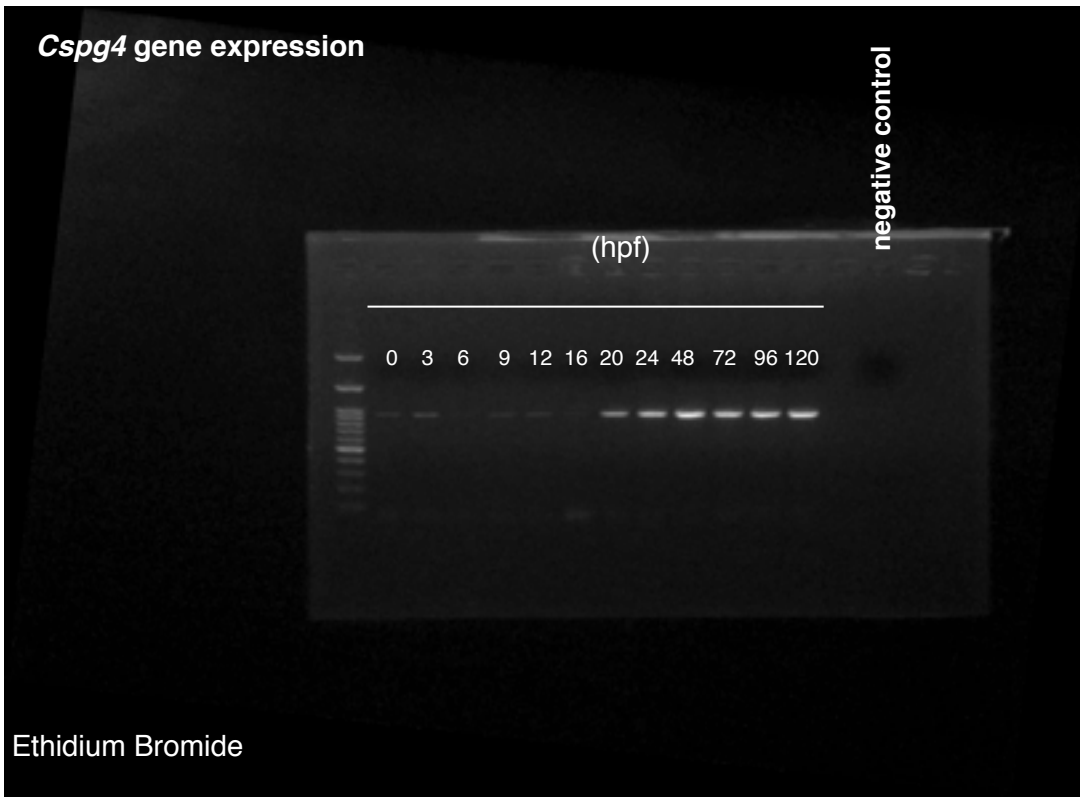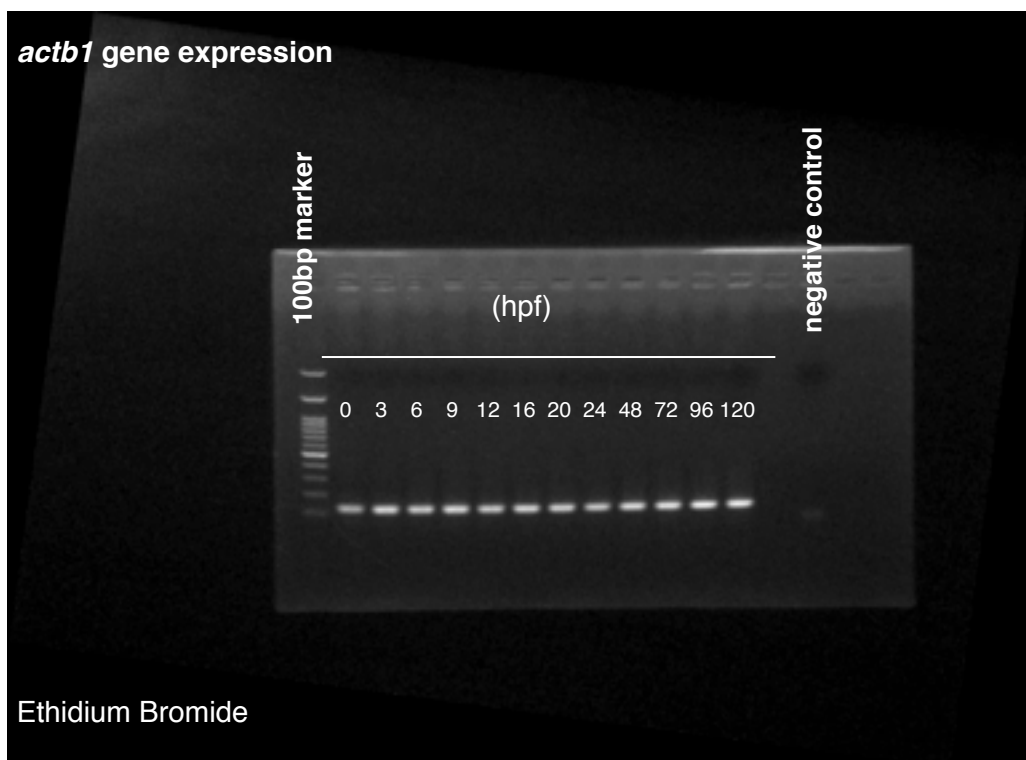

Fig3A

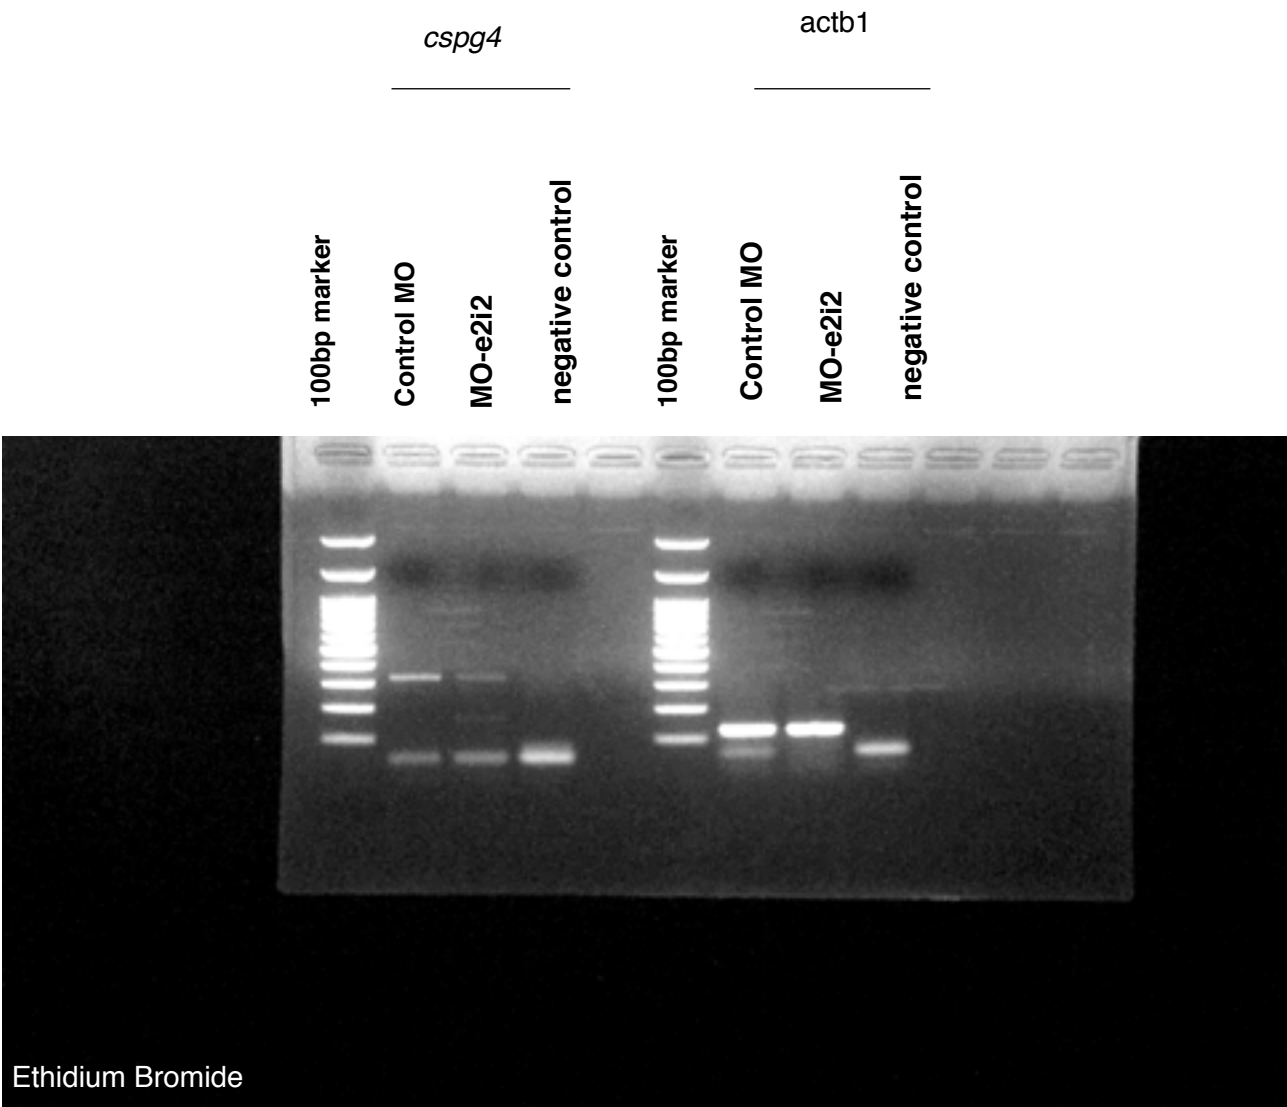

Fig6B

IB:Flag

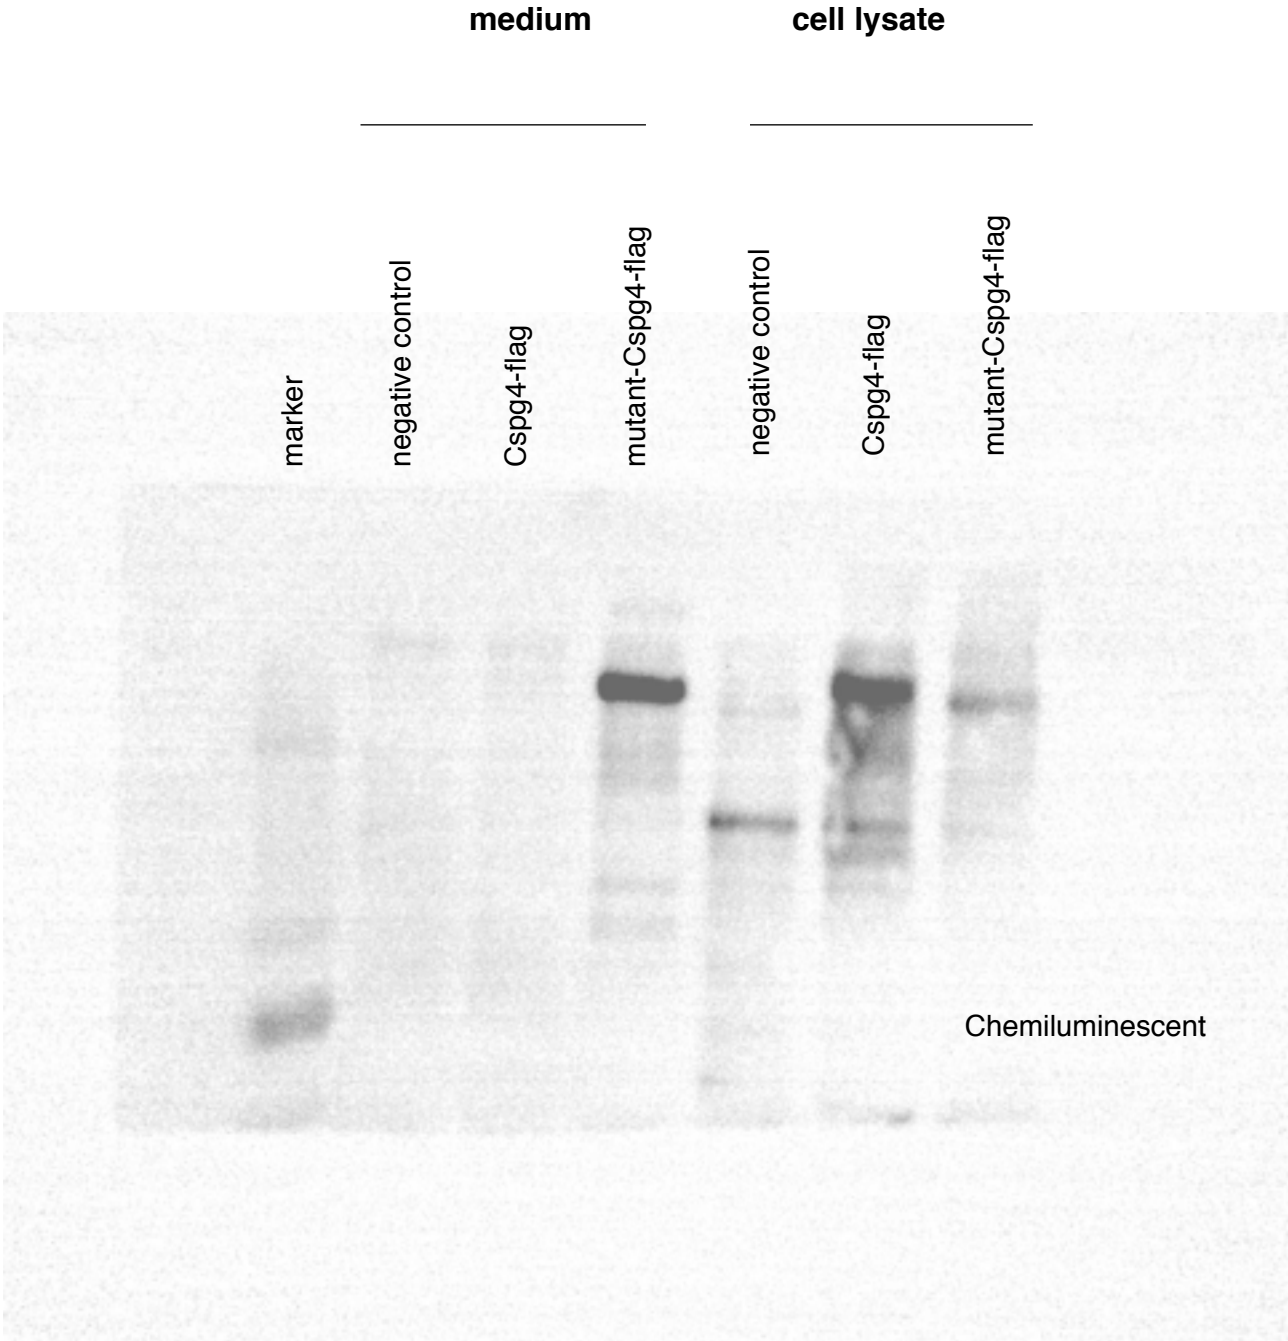

Flg7A  
IB: Flag

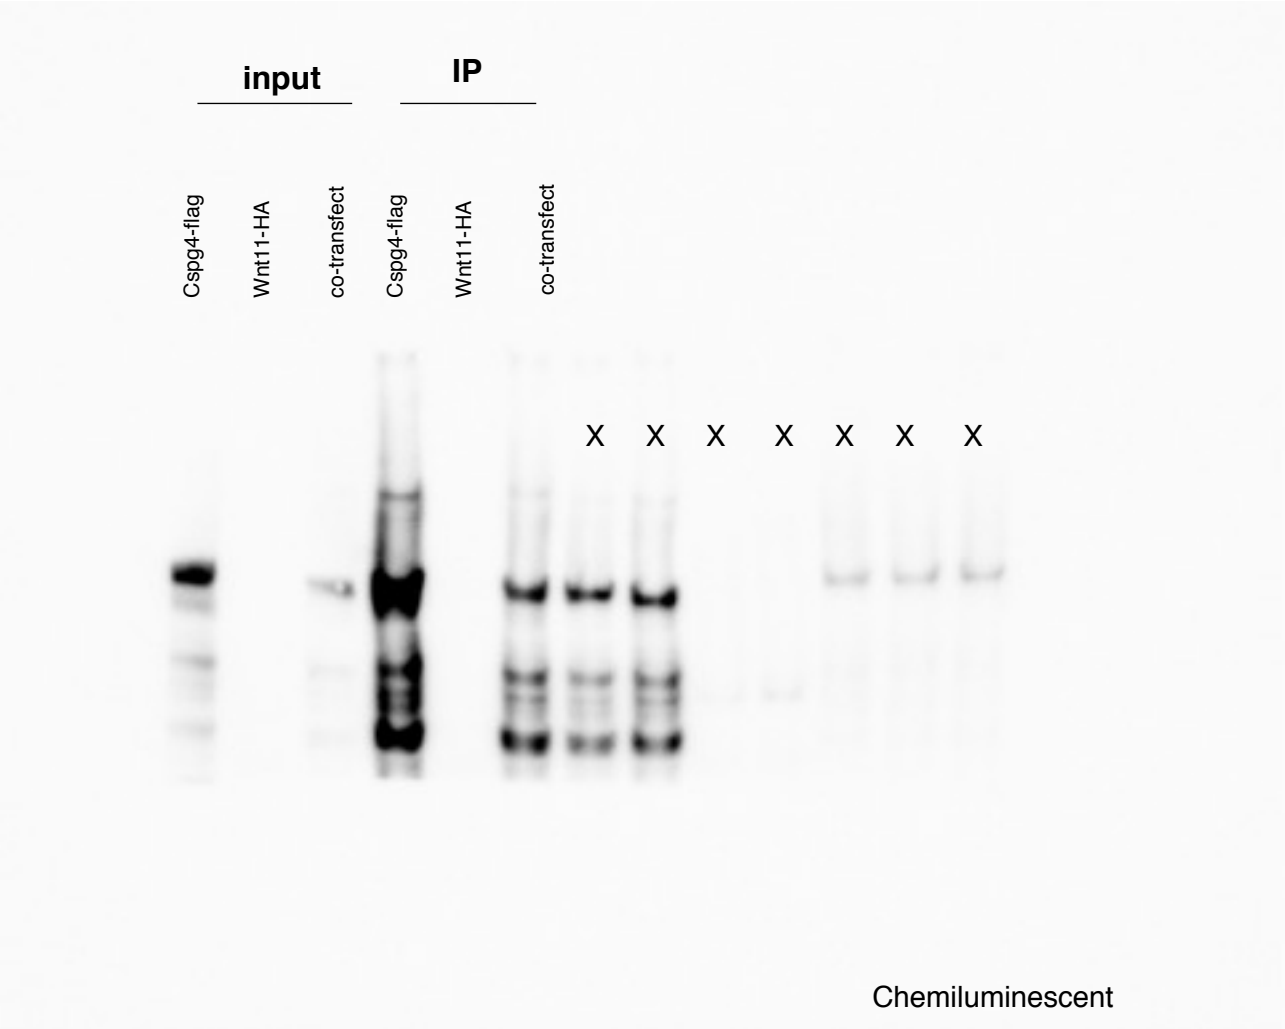

x: lanes not included in the final figure

Fig. 7B  
IB:HA

**input**

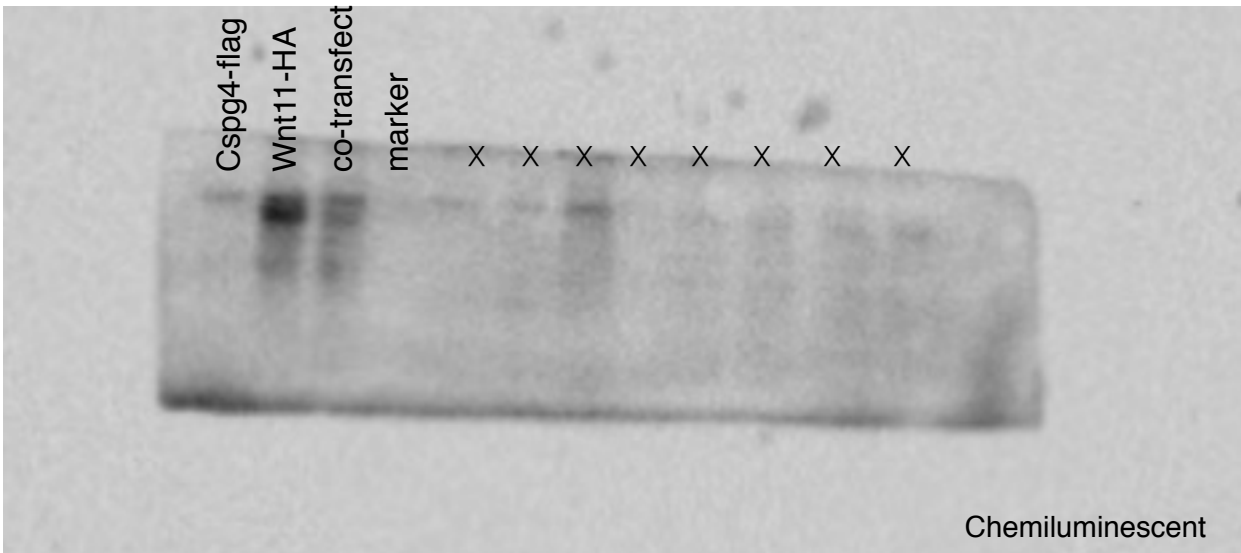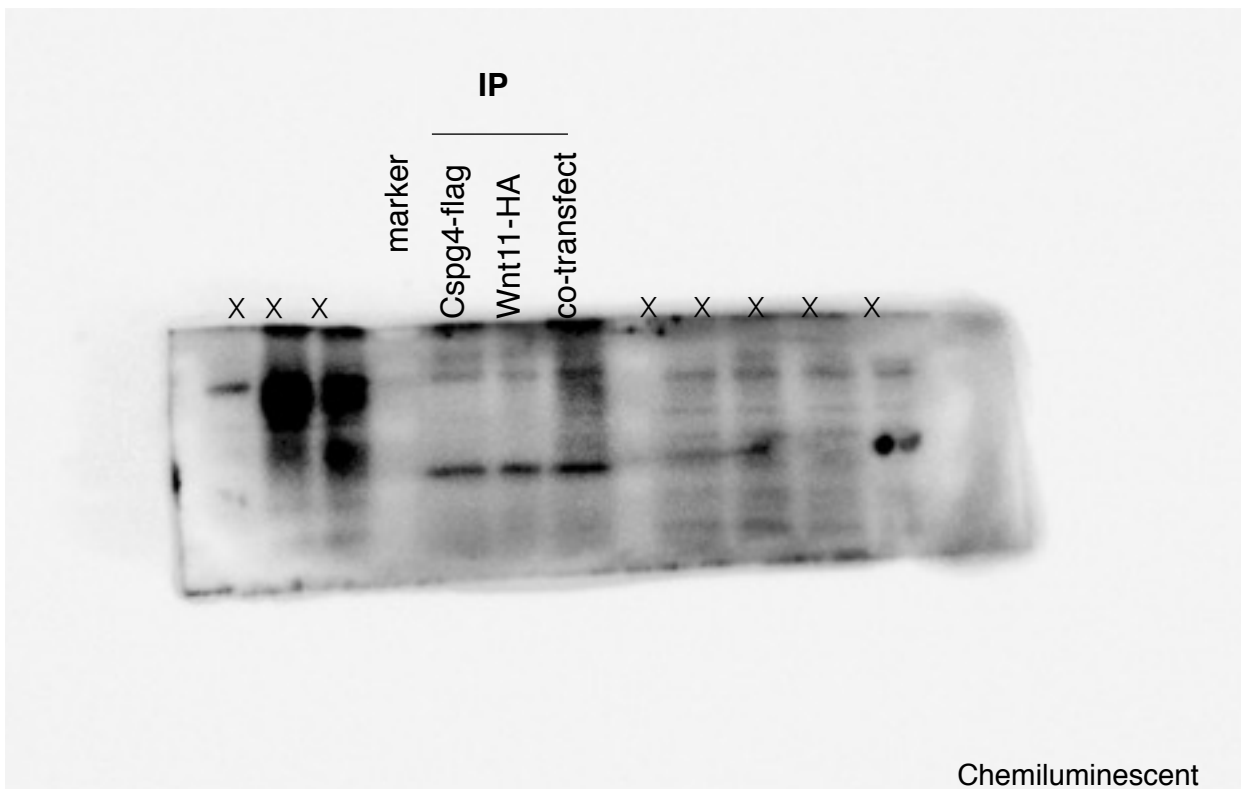

Supplement: pone.0230943.s004.pdf [file pone.0230943.s004.pdf]
